# Supplementary material
Source: MDPI journal article supplement (https://www.mdpi.com/2077-1444/14/10/1262)
Supplement: s1 [file s1]

Table S1: Countries of origin for international immigrants.

| Coutry      | Fre | Per   | Cum   | Country      | Fre | Per  | Cum   |
|-------------|-----|-------|-------|--------------|-----|------|-------|
| Afghan      | 38  | 4.09  | 4.09  | Lebanon      | 9   | 0.97 | 48.38 |
| Algeria     | 12  | 1.29  | 5.39  | Liberia      | 1   | 0.11 | 48.49 |
| Angola      | 1   | 0.11  | 5.5   | Libya        | 7   | 0.75 | 49.25 |
| Argentina   | 2   | 0.22  | 5.71  | Malaysia     | 1   | 0.11 | 49.35 |
| Azerbaijan  | 6   | 0.65  | 6.36  | Mali         | 17  | 1.83 | 51.19 |
| Bahrain     | 1   | 0.11  | 6.47  | Mauritania   | 7   | 0.75 | 51.94 |
| Bangladesh  | 7   | 0.75  | 7.22  | Mauritius    | 2   | 0.22 | 52.16 |
| Belarus     | 2   | 0.22  | 7.44  | Mexico       | 2   | 0.22 | 52.37 |
| Bolivia     | 9   | 0.97  | 8.41  | Morocco      | 4   | 0.43 | 52.8  |
| Brazil      | 2   | 0.22  | 8.62  | Nepal        | 16  | 1.72 | 54.53 |
| British     | 4   | 0.43  | 9.05  | Netherland   | 1   | 0.11 | 54.63 |
| Bulgaria    | 2   | 0.22  | 9.27  | Nicaragua    | 1   | 0.11 | 54.74 |
| Cameroon    | 6   | 0.65  | 9.91  | Niger        | 26  | 2.8  | 57.54 |
| Canada      | 1   | 0.11  | 10.02 | Pakistan     | 46  | 4.96 | 62.5  |
| Chad        | 1   | 0.11  | 10.13 | Palestine    | 19  | 2.05 | 64.55 |
| Chile       | 2   | 0.22  | 10.34 | Paraguay     | 2   | 0.22 | 64.76 |
| Colombia    | 9   | 0.97  | 11.31 | Peru         | 7   | 0.75 | 65.52 |
| Congo       | 4   | 0.43  | 11.75 | Philippines  | 2   | 0.22 | 65.73 |
| Cote Divoir | 2   | 0.22  | 11.96 | Romania      | 1   | 0.11 | 65.84 |
| Cuba        | 3   | 0.32  | 12.28 | Russia       | 13  | 1.4  | 67.24 |
| Djibouti    | 5   | 0.54  | 12.82 | Rwanda       | 1   | 0.11 | 67.35 |
| Ecuador     | 3   | 0.32  | 13.15 | Saudi Arabia | 10  | 1.08 | 68.43 |
| Egypt       | 42  | 4.53  | 17.67 | Senegal      | 1   | 0.11 | 68.53 |
| Ethiopia    | 37  | 3.99  | 21.66 | Somalia      | 11  | 1.19 | 69.72 |
| France      | 3   | 0.32  | 21.98 | South Africa | 4   | 0.43 | 70.15 |
| Georgia     | 4   | 0.43  | 22.41 | SriLanka     | 1   | 0.11 | 70.26 |
| Germany     | 2   | 0.22  | 22.63 | Sudan        | 10  | 1.08 | 71.34 |
| Ghana       | 1   | 0.11  | 22.74 | Switzerland  | 1   | 0.11 | 71.44 |
| Guatemala   | 1   | 0.11  | 22.84 | Syria        | 29  | 3.13 | 74.57 |
| Guinea      | 5   | 0.54  | 23.38 | Tajikistan   | 9   | 0.97 | 75.54 |
| India       | 98  | 10.56 | 33.94 | Tanzania     | 4   | 0.43 | 75.97 |
| Indonesia   | 2   | 0.22  | 34.16 | Thailand     | 1   | 0.11 | 76.08 |
| Iran        | 20  | 2.16  | 36.31 | Togo         | 2   | 0.22 | 76.29 |
| Iraq        | 42  | 4.53  | 40.84 | Tunisia      | 2   | 0.22 | 76.51 |
| Israeli     | 1   | 0.11  | 40.95 | Turkey       | 10  | 1.08 | 77.59 |
| Italy       | 1   | 0.11  | 41.06 | USA          | 3   | 0.32 | 77.91 |
| Jordan      | 16  | 1.72  | 42.78 | Uganda       | 7   | 0.75 | 78.66 |
| Kazakhstan  | 3   | 0.32  | 43.1  | Ukraine      | 4   | 0.43 | 79.09 |
| Kenya       | 27  | 2.91  | 46.01 | Uzbekistan   | 15  | 1.62 | 80.71 |

|            |   |      |       |           |     |       |       |
|------------|---|------|-------|-----------|-----|-------|-------|
| Korea      | 6 | 0.65 | 46.66 | Venezuela | 1   | 0.11  | 80.82 |
| Kyrgyzstan | 7 | 0.75 | 47.41 | Yemen     | 178 | 19.18 | 100   |

Table S2:Regions of origin for international immigrants.

|                         | Fre | Per   | Cum   |
|-------------------------|-----|-------|-------|
| 非洲地区 Africa             | 182 | 19.61 | 19.61 |
| 中东地区 Middle East        | 392 | 42.24 | 61.85 |
| 欧美地区 Europe and America | 79  | 8.51  | 70.37 |
| 亚洲地区 Asia               | 275 | 29.63 | 100   |
|                         | 928 | 100   |       |
